# Supplementary material for: PRKDC promotes hepatitis B virus transcription through enhancing the binding of RNA Pol II to cccDNA
Source: PubMed Central journal article supplement (PMC9038722; doi:10.1038/s41419-022-04852-3), 2022-04-25

Figure 1B

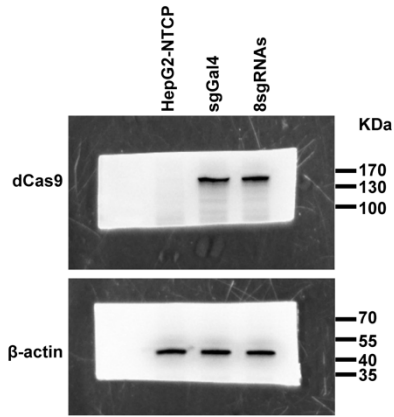

Figure 1E

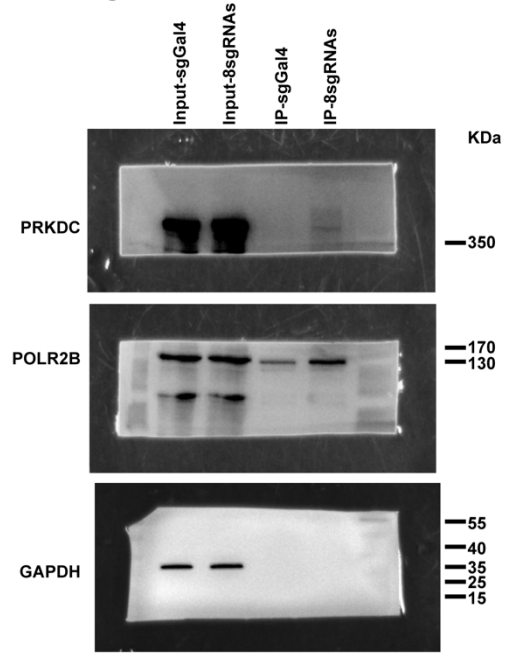

Figure 1D

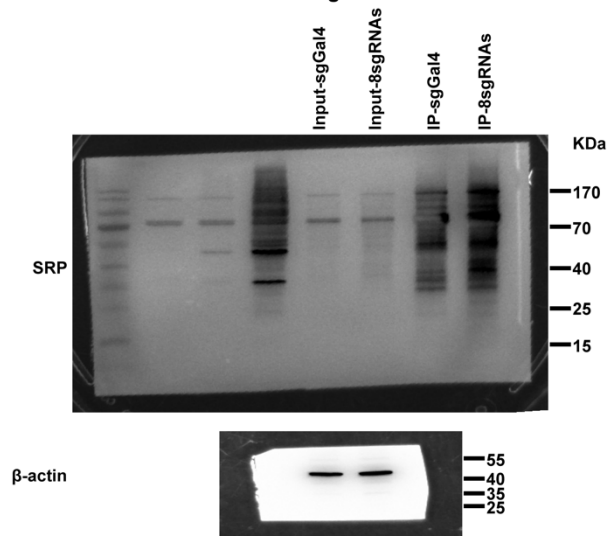

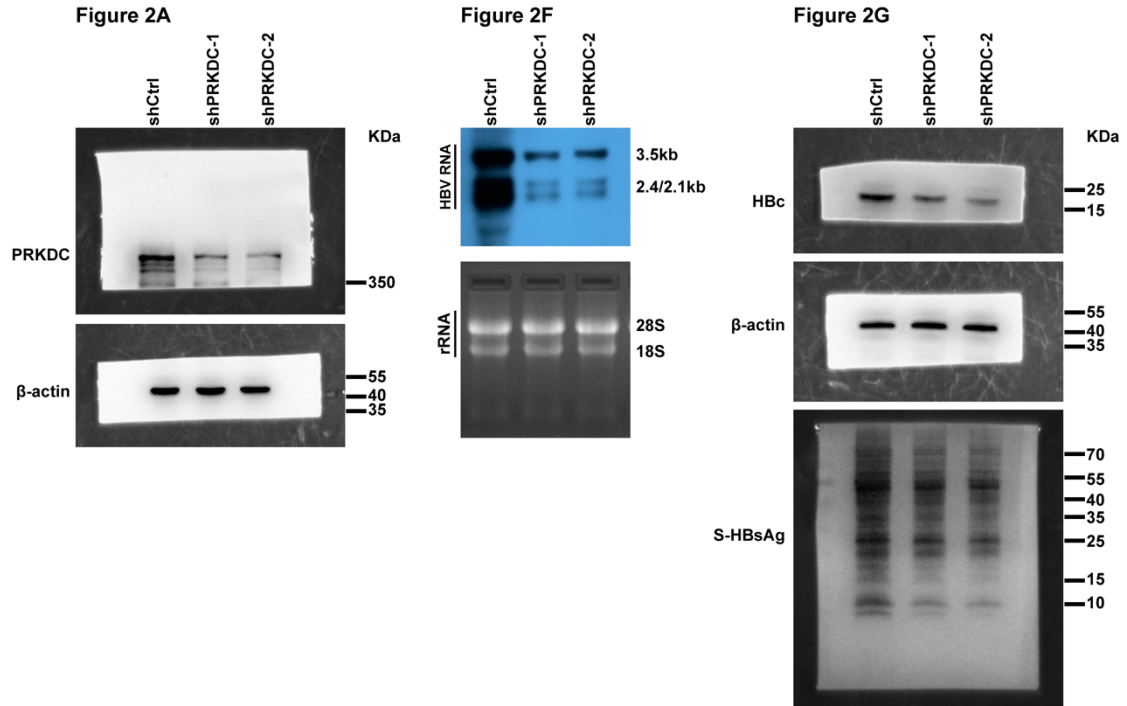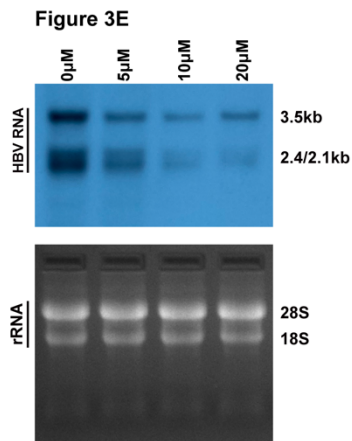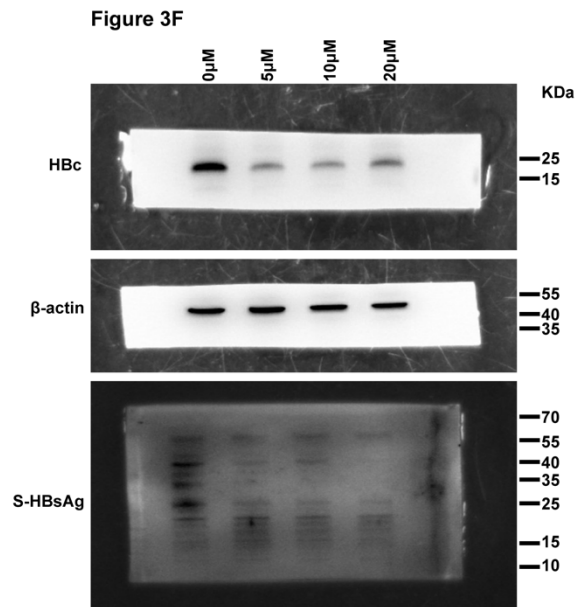

Figure 5C upper-left

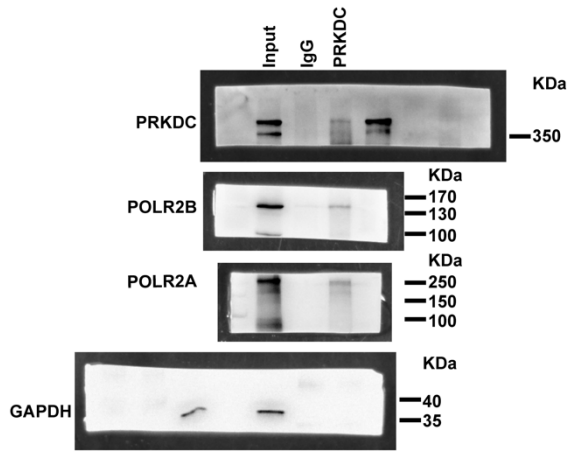

Figure 5C upper-middle

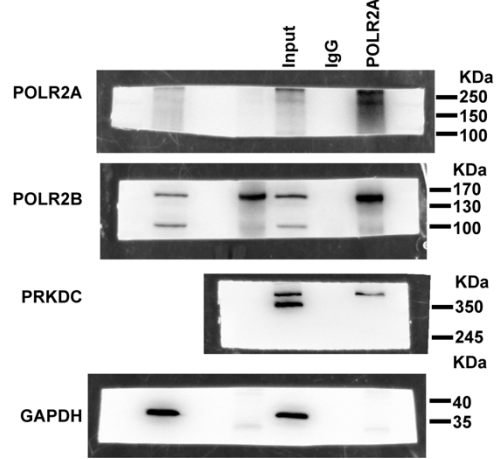

Figure 5C upper-right

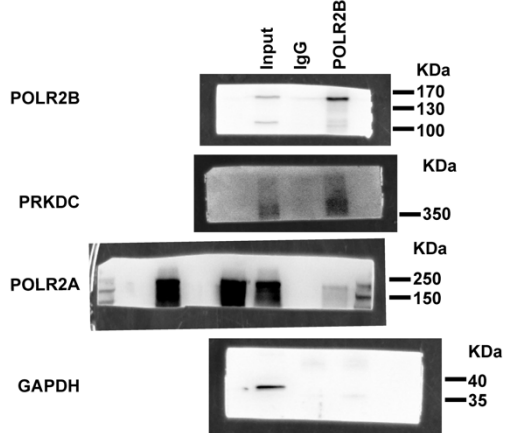

Figure 5C bottom-left

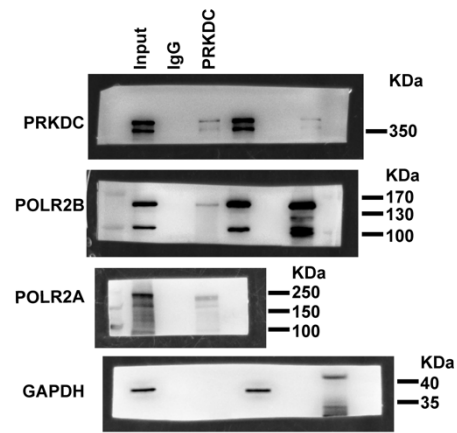

Figure 5C bottom-middle

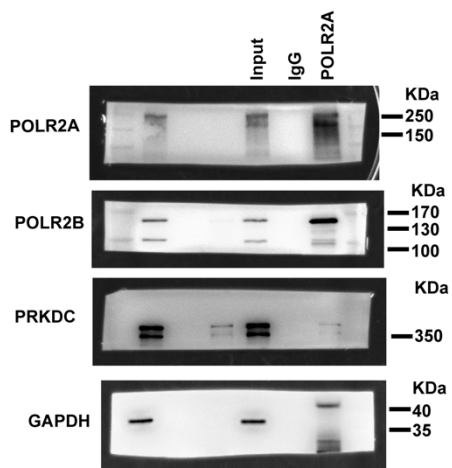

Figure 5C bottom-right

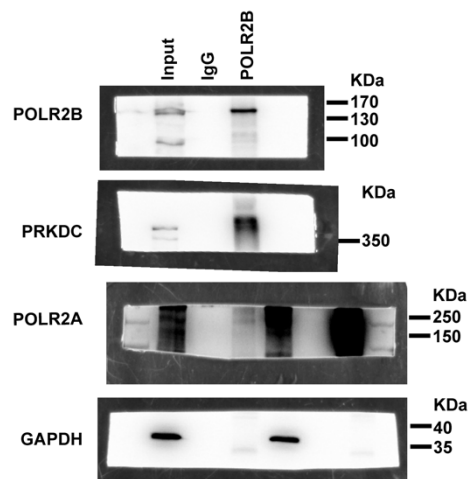

Figure 7A

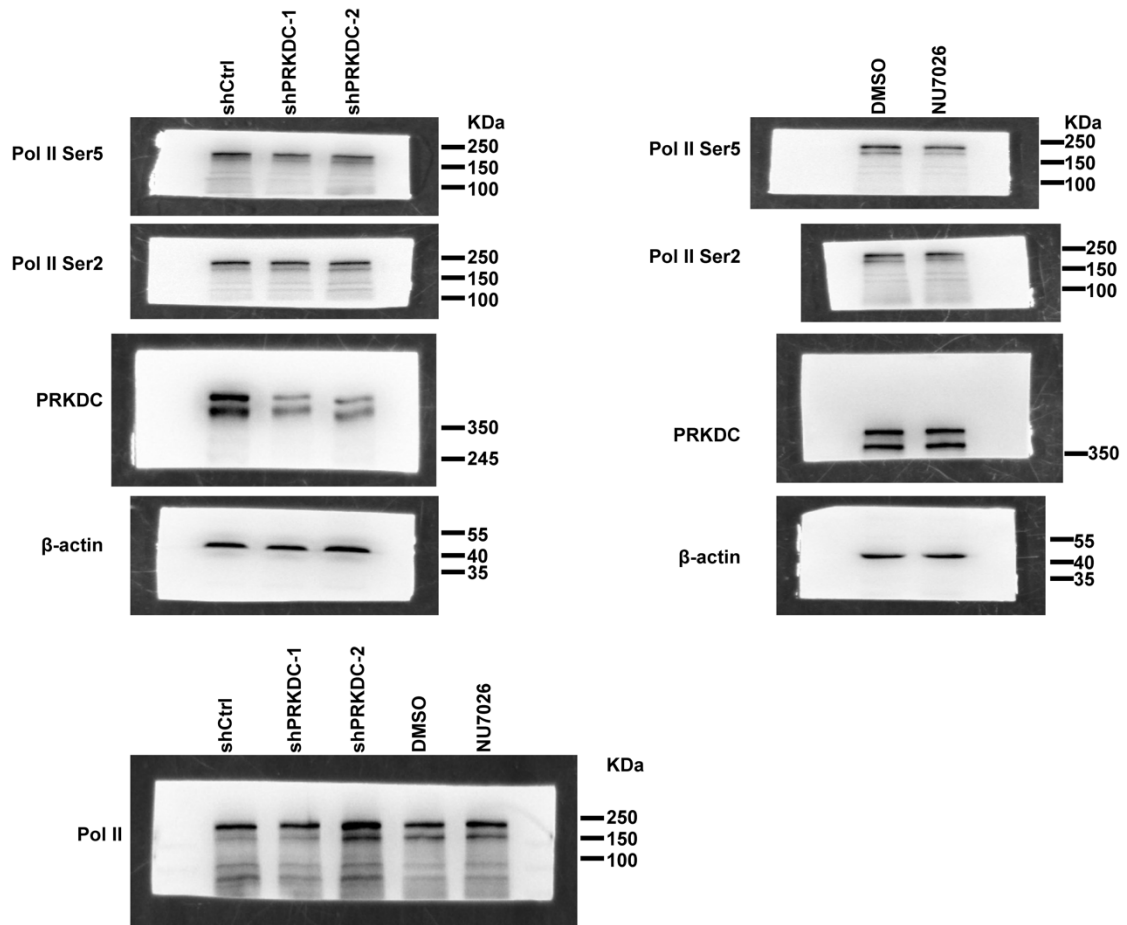

Supplementary Figure 4A

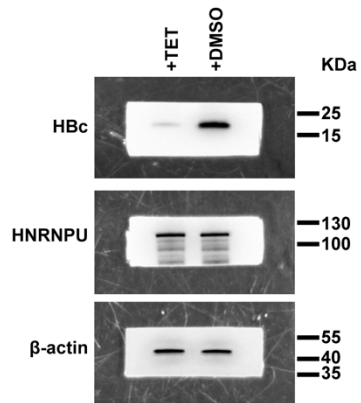

Supplementary Figure 4B

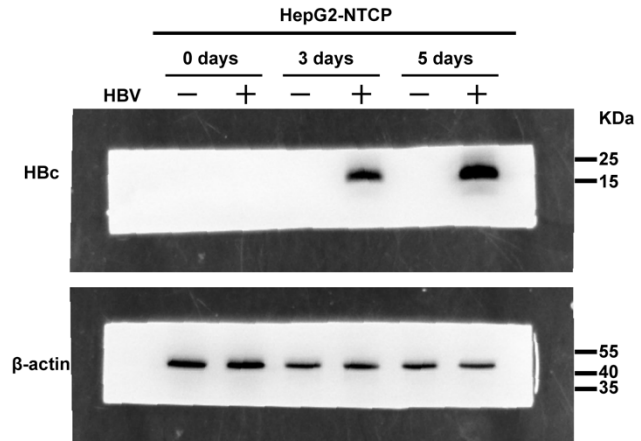

Supplementary Figure 6C

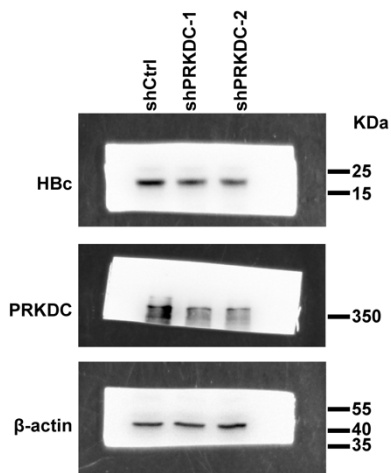

Supplementary Figure 7C

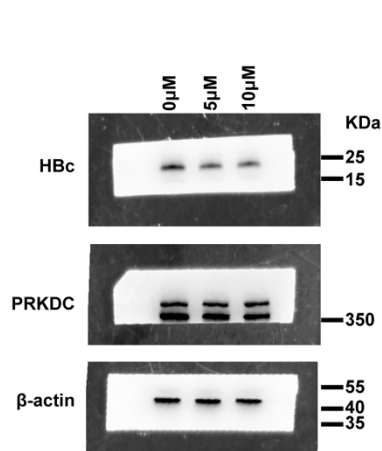

Supplementary Figure 8

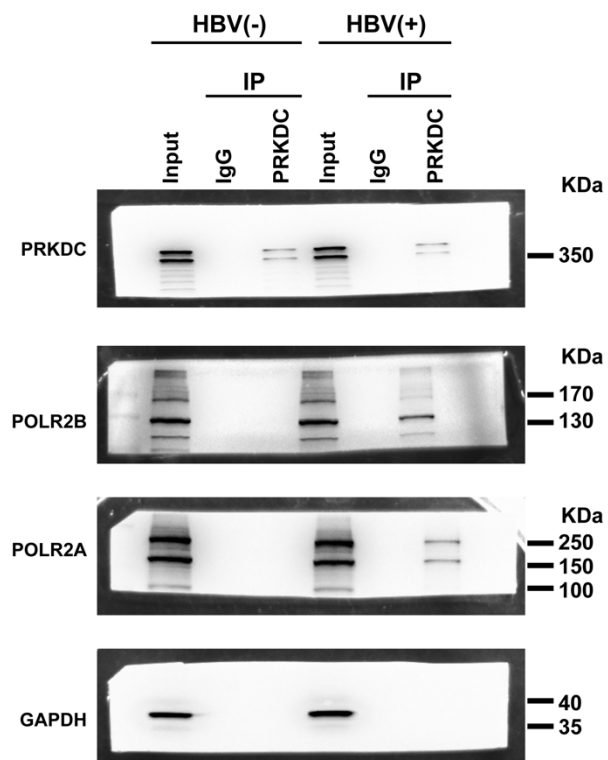

Supplement: 41419_2022_4852_MOESM3_ESM.pdf [file 41419_2022_4852_MOESM3_ESM.pdf]
