# Supplementary material for: PRKDC promotes hepatitis B virus transcription through enhancing the binding of RNA Pol II to cccDNA
Source: PubMed Central journal article supplement (PMC9038722; doi:10.1038/s41419-022-04852-3), 2022-04-25
Supplement: 41419_2022_4852_MOESM2_ESM.pdf [file 41419_2022_4852_MOESM2_ESM.pdf]

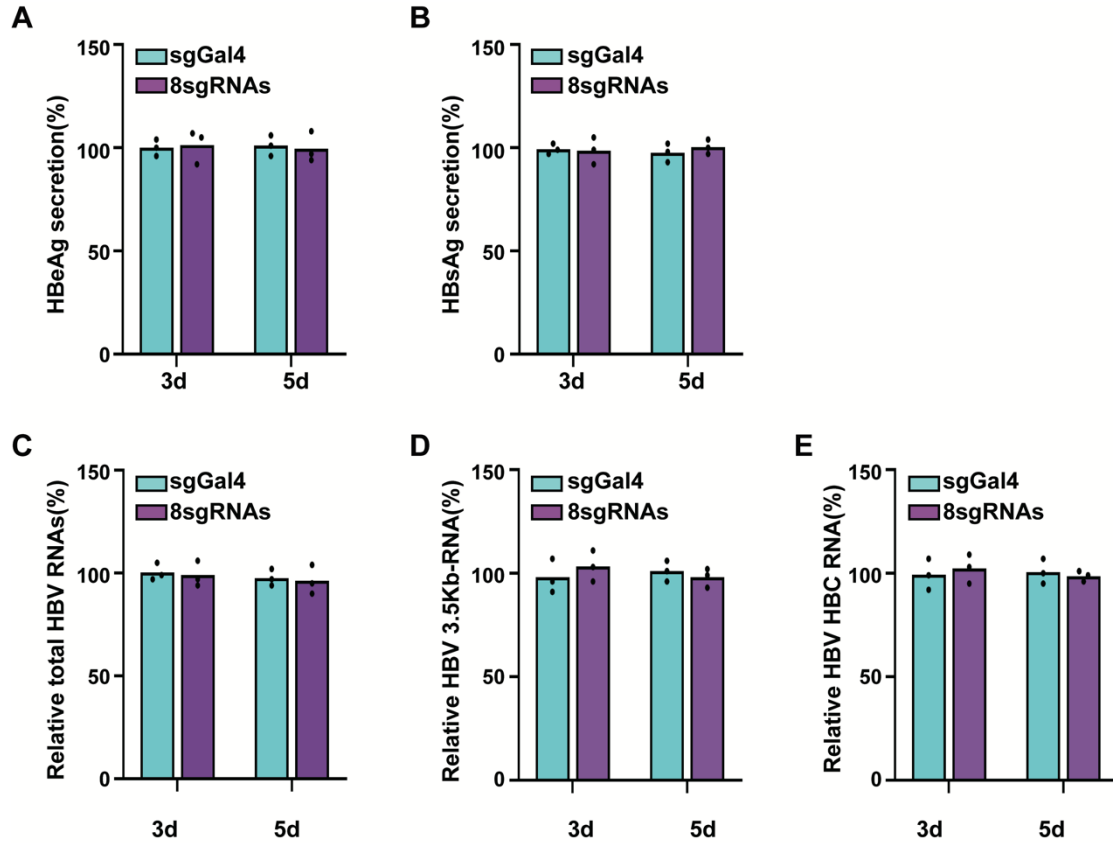

**Figure S1. Stable cell lines denoted as sgGal4 and 8sgRNAs occupied same infection ability.** Stable cell lines were infected with  $1 \times 10^3$  genome equivalents/cell of HBV particles for 24 hours. Cells were harvested for evaluating transcription at indicated time points. The secretion of HBeAg (A) and HBsAg (B) in supernatant was detected using ELISA assay in HBV infected cells. HBV RNAs was analyzed by real-time PCR using specific primers (C-E).

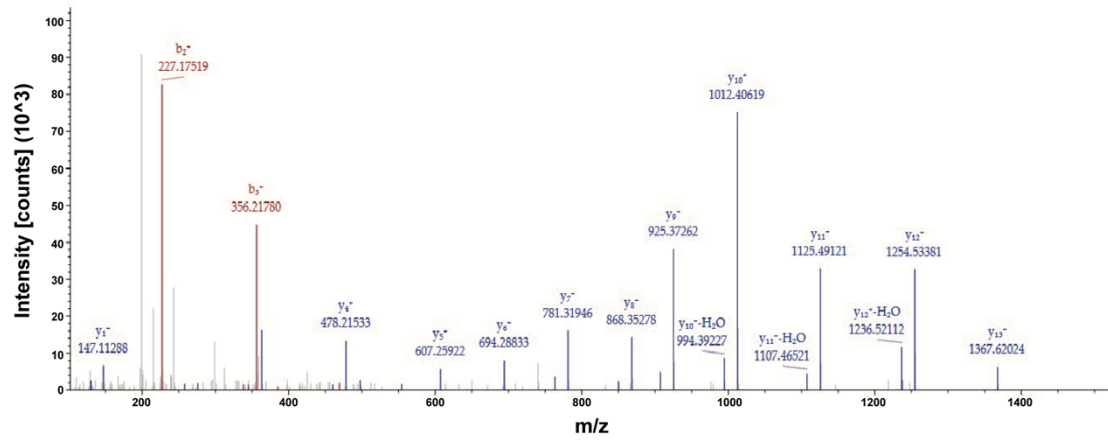

**Figure S2. MS spectral identification of cccDNA associated proteins.** The products were separated by SDS-PAGE followed by Mass Spectrometry (MS) analysis, PRKDC was selected as example.

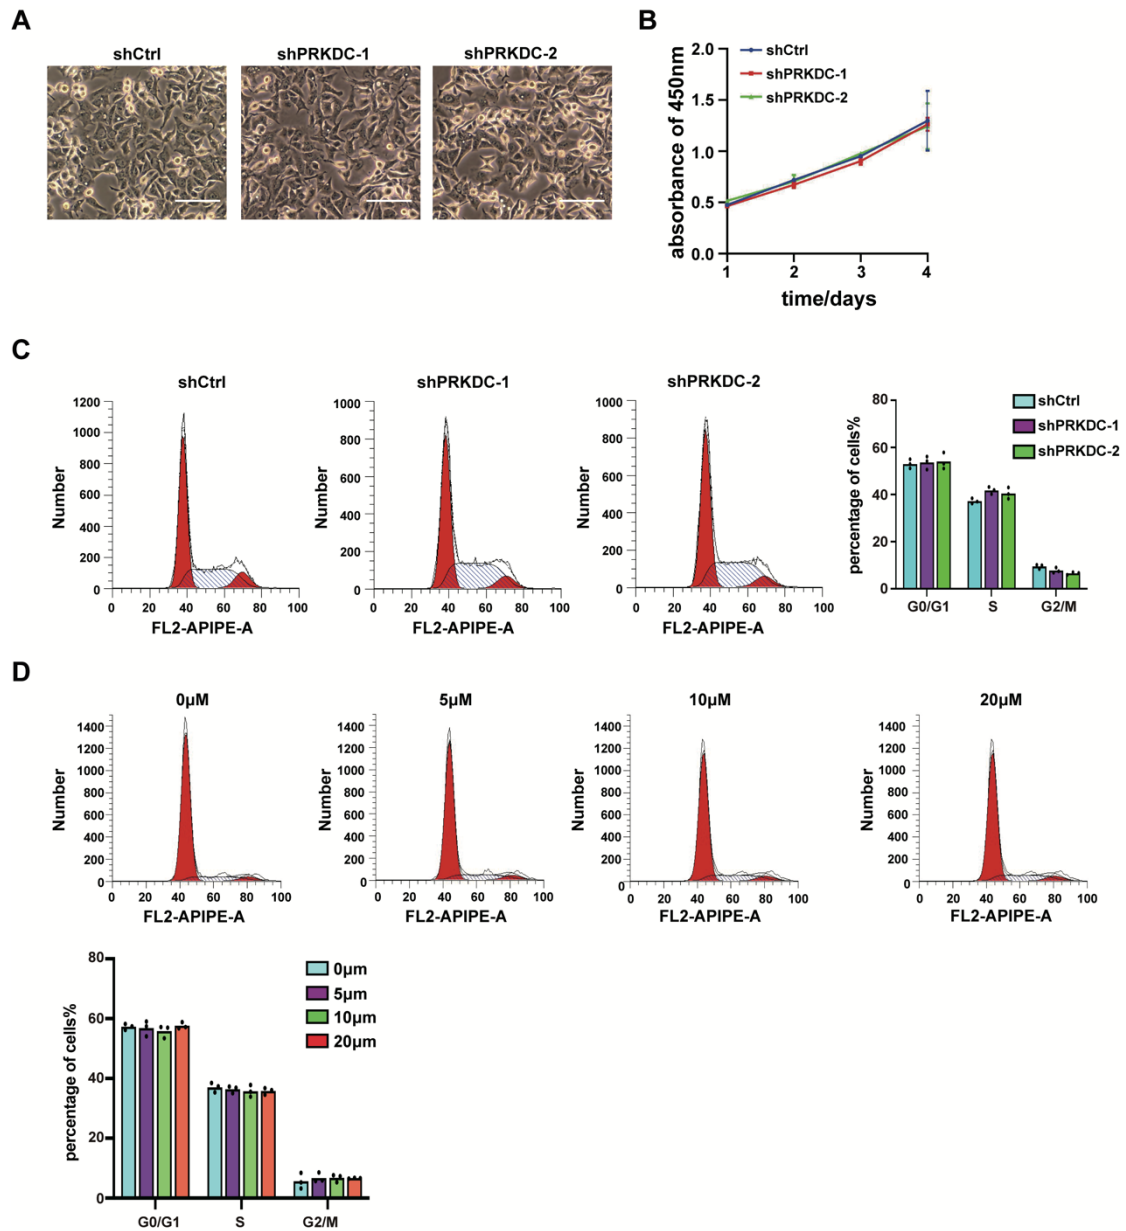

**Figure S3. PRKDC knockdown or NU7026 treatment did not affect cell cycle and proliferation of HepG2-NTCP.** (A) Bright field observation of cell status. The scale bar represents 50  $\mu$ m. (B) Effects of PRKDC depletion on the cell proliferation were determined by the MTT assay. (C) Cell cycle analysis of shRNAs treated HepG2-NTCP cells by flow cytometry. (D) Cell cycle analysis of NU7026 treated HepG2-NTCP cells by flow cytometry.

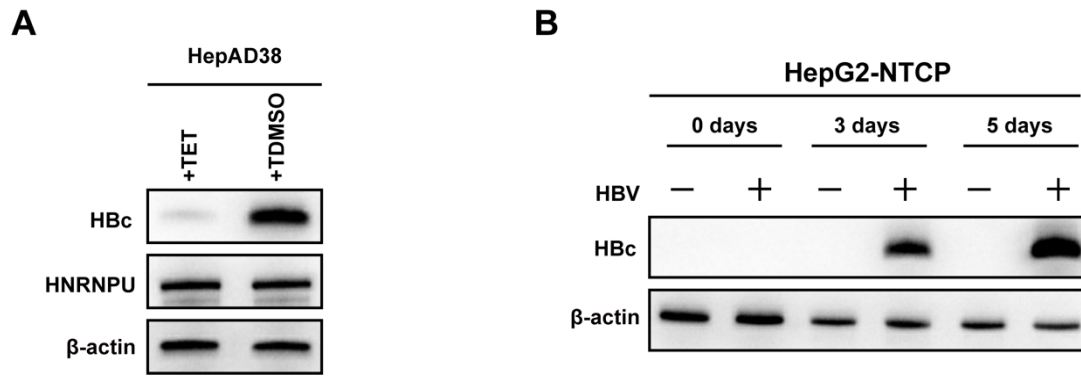

**Figure S4. The specificity of HBc antibody was verified by western blot analysis.**

(A) The HepAD38 cell line was treated with Tetracycline (TET) and DMSO respectively for two weeks, the expression of HBc were analyzed by western blotting. HNRNPU and  $\beta$ -actin as loading controls. (B) HepG2-NTCP cells were infected with or without  $1 \times 10^3$  genome equivalents/cell of HBV particles in the presence of 4% PEG8000 for 24h, respectively. the expression of HBc were analyzed by western blotting.  $\beta$ -actin as loading control.

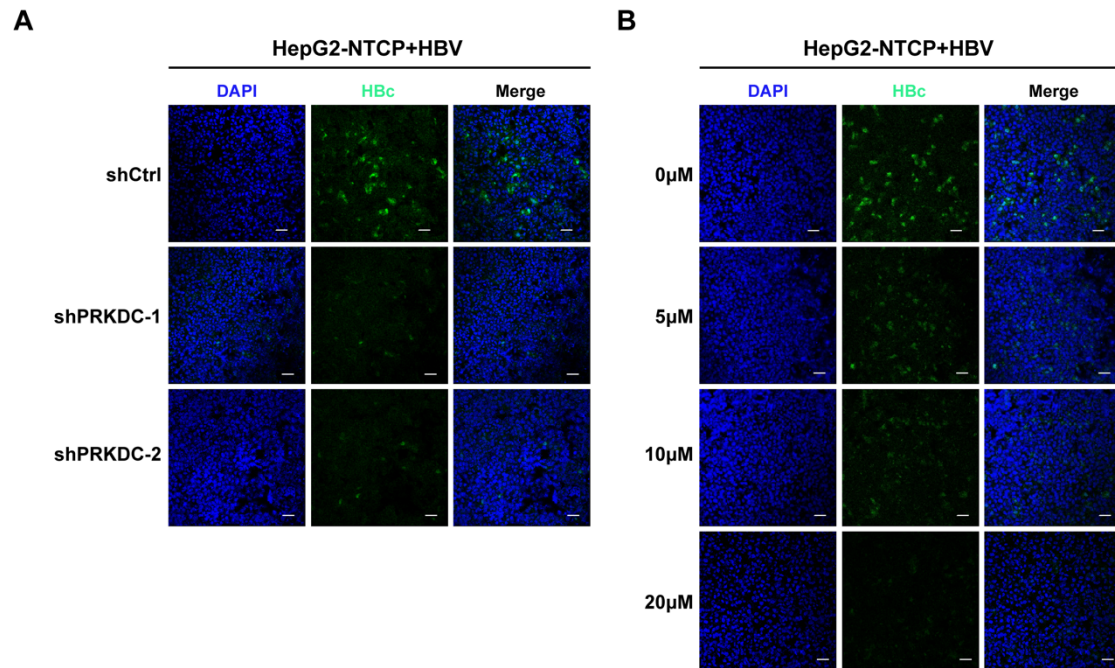

**Figure S5. PRKDC knockdown or NU7026 treatment in HBV-infected HepG2-NTCP inhibited HBc expression.** HepG2-NTCP cells were seeded in collagen-coated cover glass, and then transduced with lentivirus expressing the PRKDC knockdown shRNAs (A) or treated with NU7026 (B) for indicated days, the expressions of HBc were analyzed by immunofluorescence.

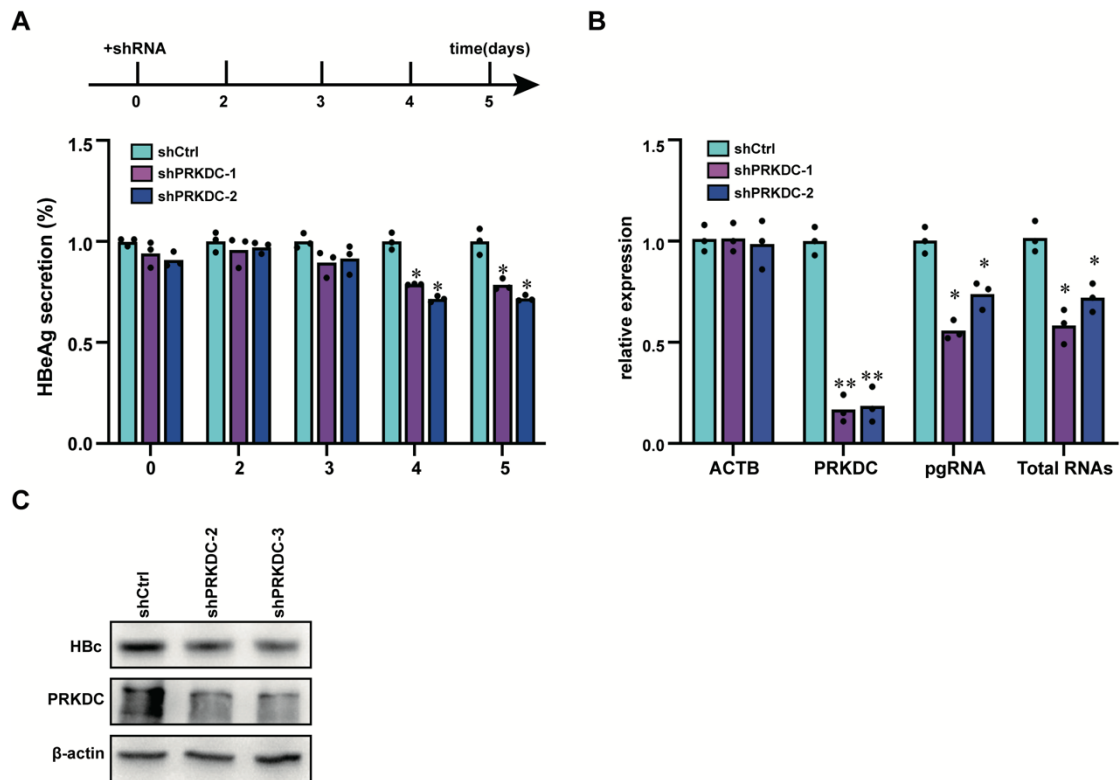

**Figure S6. PRKDC knockdown in HepG2.2.15 inhibited HBeAg secretion and HBV transcription.** (A) (Upper) The timeline of shRNA knockdown in HepG2.2.15. HepG2.2.15 cells were seeded in wells, and the PRKDC shRNAs virus were added at the same time. Two days later, the supernatants and cells were collected for detection of HBV HBeAg, pgRNA and total HBV RNAs by Elisa or RT-qPCR. Subsequently, the cells were collected for the same detections each day until the indicated time. WB for HBeAg antibody was performed at last day. (Bottom) PRKDC suppression decreased HBeAg secretion as detected by ELISA kit. (B) HBV RNAs, pgRNA, and PRKDC were analyzed by real-time PCR using specific primers. (C) Western blot analysis with specific antibodies against HBeAg and PRKDC.  $\beta$ -actin as loading control.

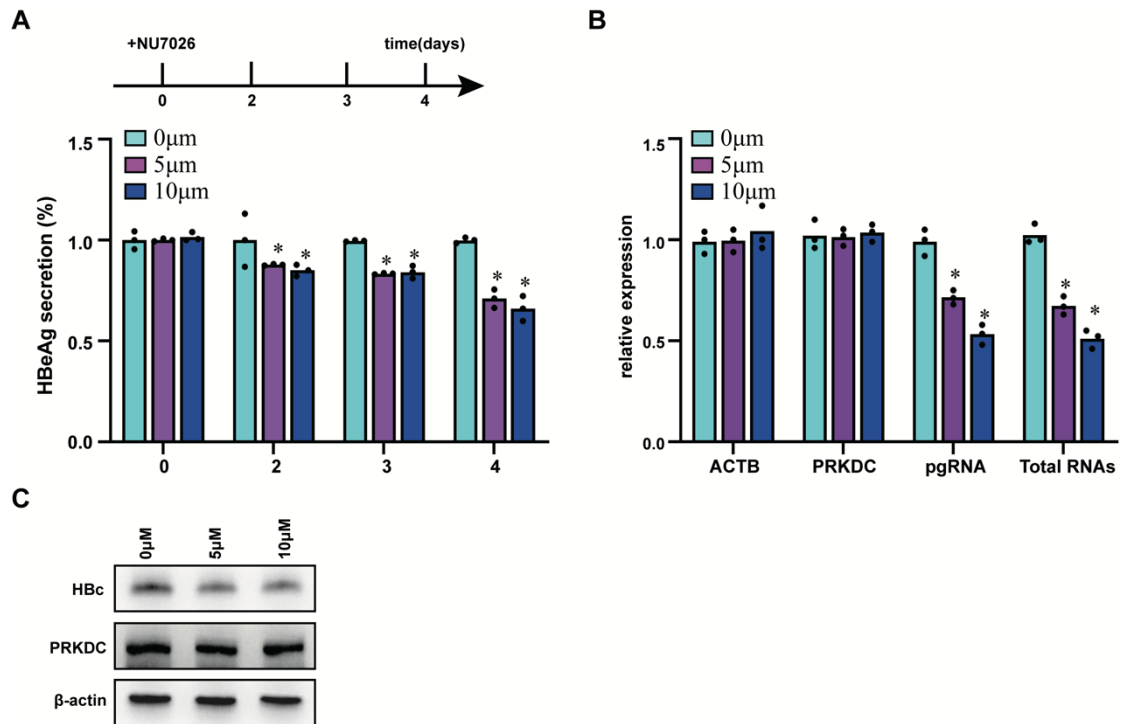

**Figure S7 NU7026 treatment in HepG2.2.15 inhibited HBeAg secretion and HBV transcription.** (A) (Upper) The timeline of NU7026 treating in HepG2.2.15. HepG2.2.15 cells were seeded in wells, and the NU7026 was added at the same time. Two days later, the supernatants and cells were collected for detection of HBV HBeAg, pgRNA and total HBV RNAs by Elisa or RT-qPCR. Subsequently, the cells were collected for the same detections each day until the indicated time. WB for HBc antibody was performed at last day. (Bottom) NU7026 treatment decreased HBeAg secretion as detected by ELISA kit. (B) HBV RNAs, pgRNA, and PRKDC were analyzed by real-time PCR using specific primers. (C) Western blot analysis with specific antibodies against HBc and PRKDC.  $\beta$ -actin as loading control.

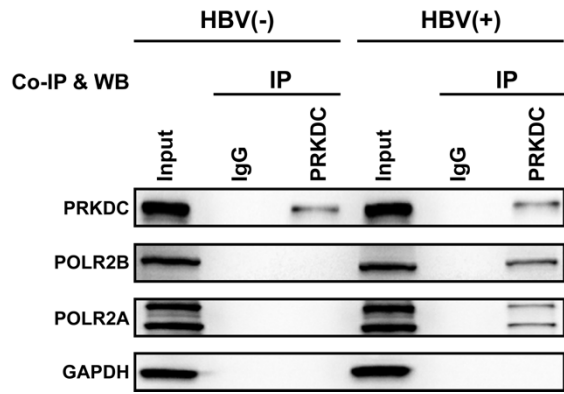

**Figure S8 PRKDC interacts with POLR2A and POLR2B.** Endogenous co-immunoprecipitation with PRKDC was carried out in HBV-infected HepG2-NTCP and mock-infected HepG2-NTCP cells using indicated antibodies and blotted with specific antibodies.



**A**

**Primer:Negative control**

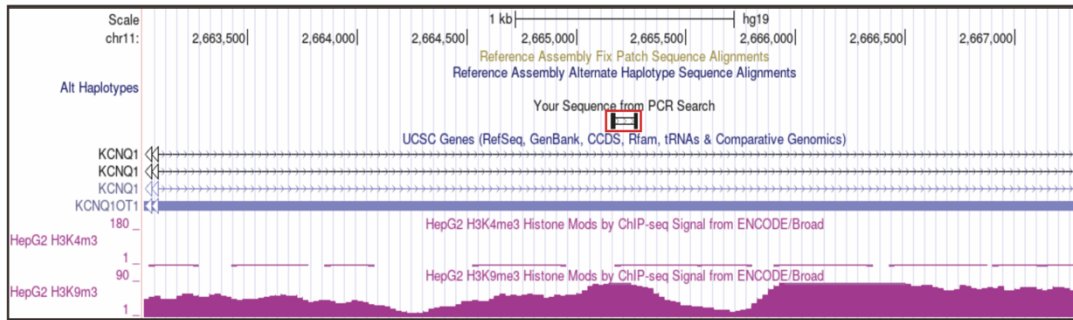

**Primer:GAPDH Ser2**

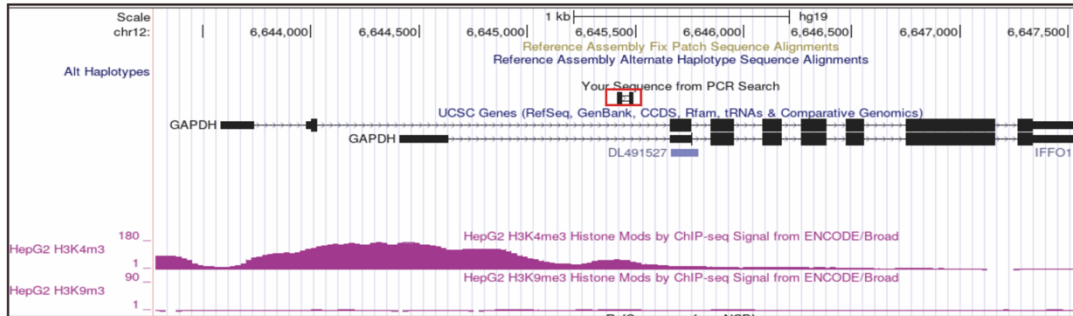

**Primer:GAPDH Ser5**

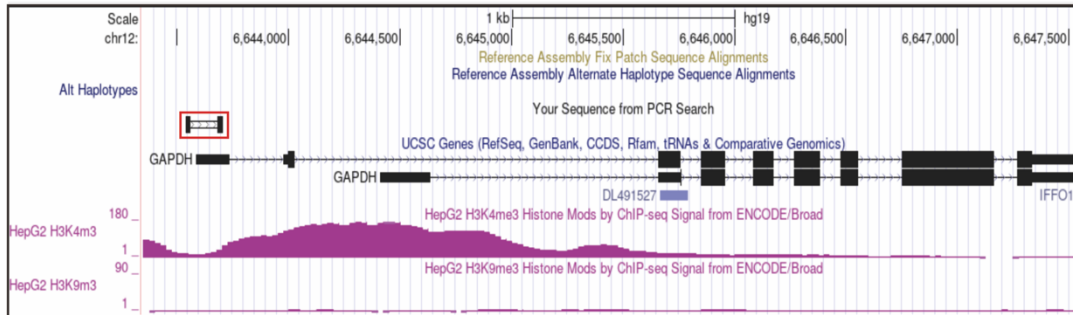

**B**

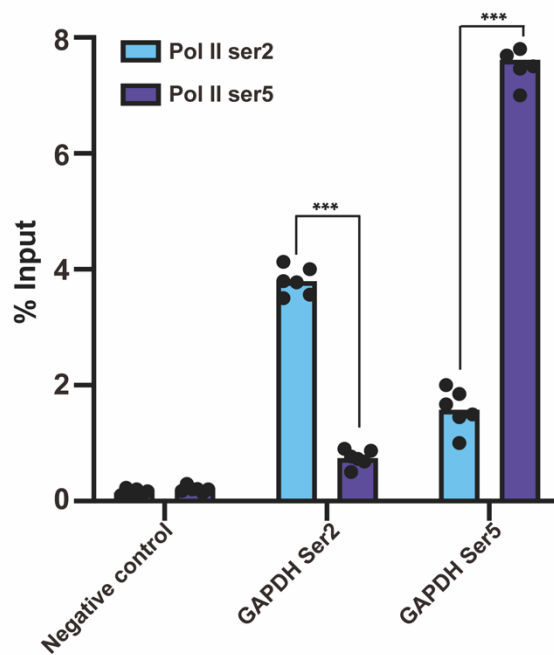

**Figure S9. The antibody specificity of Pol II Ser2, and Pol II Ser5 were detected**

**by ChIP-qPCR.** (A) The designed primers for Negative control (Upper), GAPDH Ser2 (Middle), and GAPDH Ser5 (Bottom) were analyzed in UCSC genome website. (B) HepG2-NTCP cells were cross-linked by 4% formaldehyde solution, sonicated, and immunoprecipitated with indicated antibodies. The enrichment was expressed as % input using above designed primers. \*\*\* $P < 0.001$ .

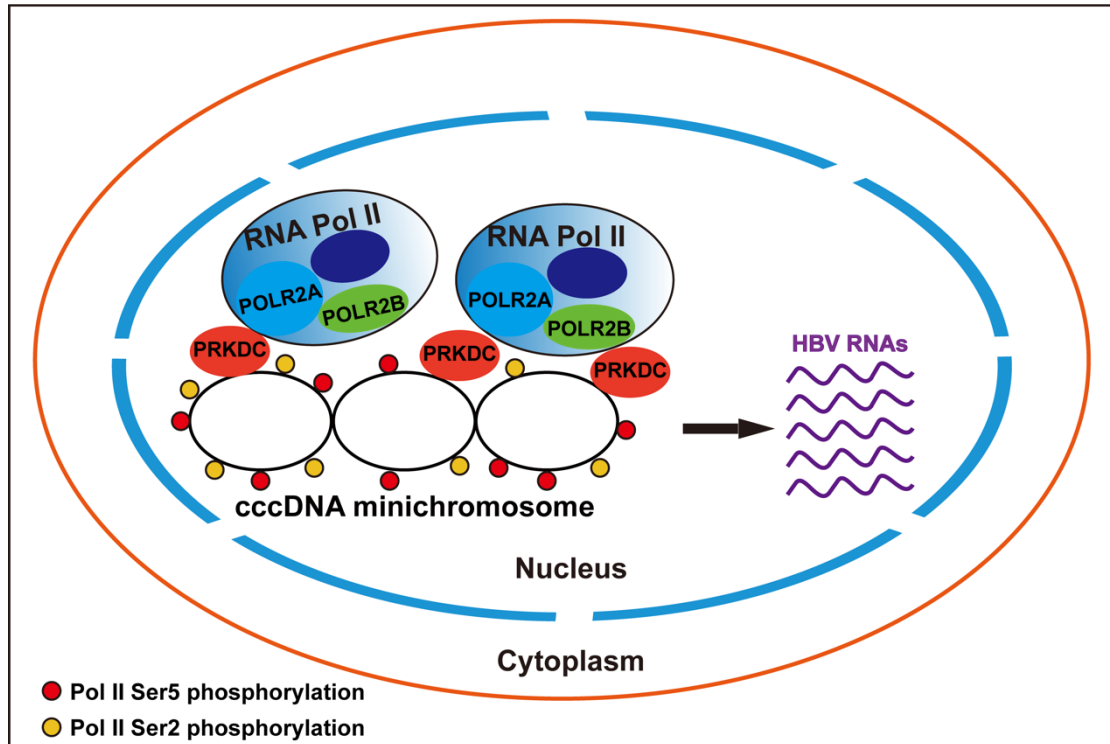

PRKDC  
knockdown  
↓  
NU7026  
treatment

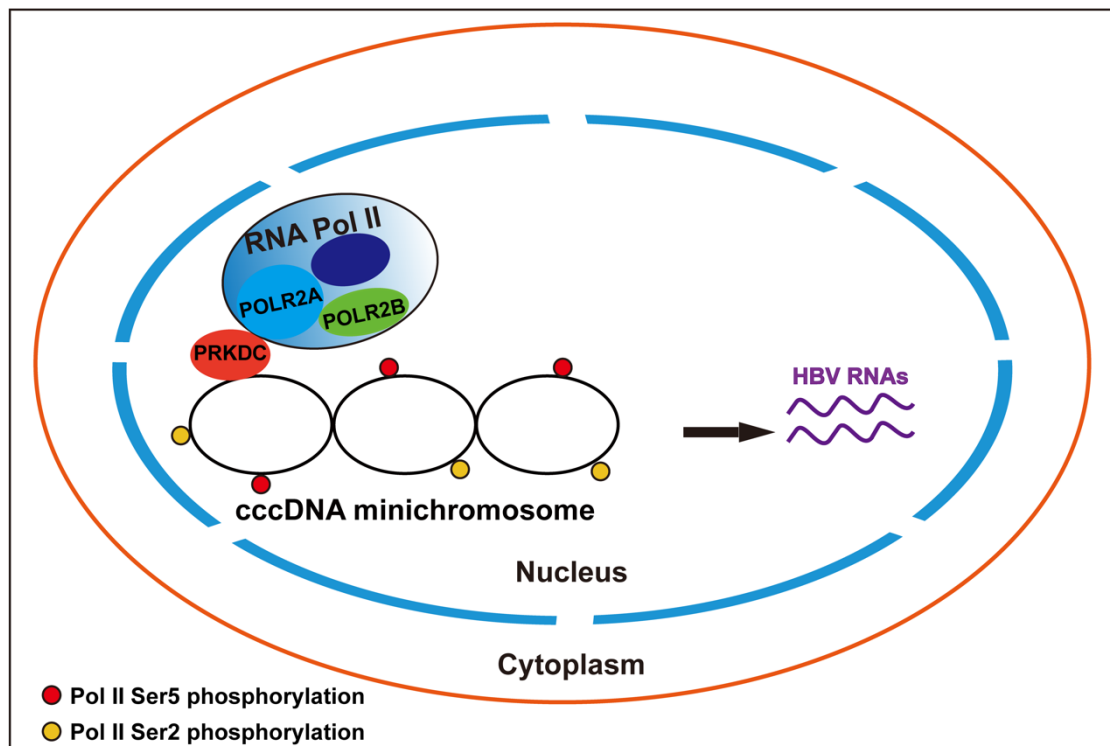

Figure S10. A proposed model for PRKDC-mediated recruitment and

**phosphorylation of Pol II among HBV cccDNA minichromosome.** In the nucleus, PRKDC facilitates HBV cccDNA transcription through interacting with POLR2A and POLR2B, the largest and second largest subunit of RNA Pol II, the recruitment of Pol II to cccDNA depends on its kinase function. PRKDC knockdown or NU7026 treatment decrease the enrichment of Pol II associated with cccDNA minichromosome, and Ser5 or Ser2 phosphorylation levels are inhibited, leading to the decrease of HBV cccDNA transcription.

**Supplementary Table S1 Proteins identified by MS**

| Accession | Gene names | sgGal4        | 8sgRNAs       |
|-----------|------------|---------------|---------------|
|           |            | Protein score | Protein score |
| O43670    | ZNF207     | 0.00          | 67.32         |
| Q96KR1    | ZFR        | 0.00          | 70.55         |
| Q9H5U6    | ZCCHC4     | 0.00          | 35.98         |
| P27348    | YWHAQ      | 89.41         | 78.55         |
| P12956    | XRCC6      | 40.57         | 86.66         |
| P13010    | XRCC5      | 127.68        | 131.86        |
| Q9HAV4    | XPO5       | 31.95         | 40.71         |
| O14980    | XPO1       | 0.00          | 78.97         |
| Q9NP79    | VTA1       | 0.00          | 54.42         |
| Q9Y277    | VDAC3      | 103.30        | 156.06        |
| P45880    | VDAC2      | 61.07         | 57.08         |
| P21796    | VDAC1      | 104.96        | 175.92        |
| P55072    | VCP        | 81.42         | 138.06        |
| P26640    | VAR51      | 41.12         | 45.29         |
| O95292    | VAPB       | 0.00          | 64.13         |
| Q93009    | USP7       | 72.07         | 123.51        |
| P45974    | USP5       | 0.00          | 55.98         |
| P51784    | USP11      | 0.00          | 60.48         |
| O60763    | USO1       | 0.00          | 29.57         |
| Q92900    | UPF1       | 94.25         | 51.65         |
| O60701    | UGDH       | 45.34         | 100.42        |
| O94874    | UFL1       | 0.00          | 51.39         |
| P0CG48    | UBC        | 56.96         | 42.38         |
| P22314    | UBA1       | 0.00          | 71.85         |
| Q16881    | TXNRD1     | 103.20        | 115.27        |
| P49411    | TUFM       | 353.20        | 223.62        |
| P68371    | TUBB4B     | 997.59        | 928.86        |
| Q13509    | TUBB3      | 0.00          | 692.47        |
| Q13885    | TUBB2A     | 828.97        | 868.28        |
| P07437    | TUBB       | 956.27        | 830.47        |
| A6NHL2    | TUBAL3     | 170.61        | 332.20        |
| Q9BQE3    | TUBA1C     | 728.48        | 743.15        |
| Q13263    | TRIM28     | 153.59        | 322.32        |
| Q14258    | TRIM25     | 0.00          | 45.70         |
| P12270    | TPR        | 44.22         | 70.80         |
| O14773    | TPP1       | 47.61         | 41.21         |
| Q3LXA3    | TKFC       | 73.05         | 0.00          |
| Q3ZCQ8    | TIMM50     | 0.00          | 44.76         |
| Q9NXG2    | THUMPD1    | 0.00          | 67.88         |
| P17987    | TCP1       | 52.45         | 72.75         |

|        |          |        |        |
|--------|----------|--------|--------|
| Q13148 | TARDBP   | 127.29 | 133.12 |
| Q92804 | TAF15    | 0.00   | 110.35 |
| Q16563 | SYPL1    | 0.00   | 55.54  |
| P0DMM9 | SULT1A3  | 40.34  | 58.97  |
| Q13586 | STIM1    | 0.00   | 48.60  |
| Q9BXP5 | SRRT     | 0.00   | 51.00  |
| Q15005 | SPCS2    | 0.00   | 42.74  |
| P14678 | SNRPB    | 26.13  | 48.24  |
| A6NHR9 | SMCHD1   | 40.03  | 67.87  |
| P08195 | SLC3A2   | 39.75  | 0.00   |
| P11166 | SLC2A1   | 49.54  | 69.79  |
| P12236 | SLC25A6  | 0.00   | 115.56 |
| P05141 | SLC25A5  | 113.43 | 0.00   |
| Q00325 | SLC25A3  | 47.10  | 0.00   |
| Q9UJS0 | SLC25A13 | 123.04 | 345.77 |
| P53007 | SLC25A1  | 50.71  | 85.90  |
| Q9H9B4 | SFXN1    | 52.16  | 122.96 |
| P23246 | SFPQ     | 111.91 | 145.27 |
| Q15637 | SF1      | 0.00   | 41.51  |
| P01008 | SERPINC1 | 0.00   | 55.85  |
| P30740 | SERPINB1 | 0.00   | 53.06  |
| Q9UHD8 | SEPTIN9  | 36.48  | 89.48  |
| O94979 | SEC31A   | 132.58 | 209.36 |
| P53992 | SEC24C   | 0.00   | 71.54  |
| O95486 | SEC24A   | 0.00   | 81.11  |
| Q15436 | SEC23A   | 57.69  | 100.18 |
| Q15020 | SART3    | 0.00   | 41.70  |
| Q9Y3Z3 | SAMHD1   | 60.81  | 112.25 |
| Q9P2E9 | RRBP1    | 69.84  | 89.35  |
| P08865 | RPSA     | 72.73  | 49.98  |
| P04843 | RPN1     | 0.00   | 108.94 |
| P05388 | RPLP0    | 152.54 | 104.26 |
| Q6NUM9 | RETSAT   | 0.00   | 62.11  |
| P46063 | RECQL    | 0.00   | 35.84  |
| Q96E39 | RBMXL1   | 0.00   | 81.94  |
| Q96PK6 | RBM14    | 0.00   | 73.08  |
| Q9NTZ6 | RBM12    | 0.00   | 42.12  |
| P49792 | RANBP2   | 55.30  | 141.24 |
| P62826 | RAN      | 0.00   | 46.81  |
| Q92878 | RAD50    | 0.00   | 77.57  |
| P51148 | RAB5C    | 0.00   | 57.55  |
| P47897 | QARS1    | 48.60  | 50.16  |
| P32322 | PYCR1    | 36.77  | 0.00   |

|        |        |         |         |
|--------|--------|---------|---------|
| P26599 | PTBP1  | 71.33   | 86.46   |
| Q06323 | PSME1  | 40.49   | 92.81   |
| Q13200 | PSMD2  | 0.00    | 52.75   |
| P62333 | PSMC6  | 88.04   | 74.07   |
| P35998 | PSMC2  | 0.00    | 113.17  |
| P62191 | PSMC1  | 41.69   | 45.48   |
| O14744 | PRMT5  | 61.69   | 61.76   |
| Q99873 | PRMT1  | 0.00    | 90.25   |
| P78527 | PRKDC  | 0.00    | 821.04  |
| P30041 | PRDX6  | 0.00    | 63.85   |
| P30048 | PRDX3  | 76.52   | 0.00    |
| P32119 | PRDX2  | 49.54   | 61.03   |
| Q06830 | PRDX1  | 65.65   | 42.94   |
| O15355 | PPM1G  | 45.27   | 54.89   |
| P16435 | POR    | 0.00    | 92.79   |
| P30876 | POLR2B | 8.45    | 50.98   |
| Q15149 | PLEC   | 0.00    | 111.56  |
| P14618 | PKM    | 37.60   | 51.62   |
| O43175 | PHGDH  | 96.98   | 0.00    |
| P35232 | PHB    | 189.33  | 129.78  |
| P08237 | PFKM   | 42.19   | 0.00    |
| P17858 | PFKL   | 0.00    | 63.12   |
| P12955 | PEPD   | 54.65   | 54.07   |
| Q15084 | PDIA6  | 54.34   | 209.10  |
| P11177 | PDHB   | 74.03   | 68.33   |
| Q53EL6 | PDCD4  | 0.00    | 39.70   |
| Q99447 | PCYT2  | 0.00    | 43.42   |
| P49585 | PCYT1A | 0.00    | 55.79   |
| P05166 | PCCB   | 159.25  | 141.91  |
| P05165 | PCCA   | 2017.85 | 2062.46 |
| Q15365 | PCBP1  | 145.45  | 194.25  |
| P11498 | PC     | 3764.27 | 3336.84 |
| P09874 | PARP1  | 38.19   | 67.71   |
| Q99497 | PARK7  | 37.35   | 0.00    |
| O43252 | PAPSS1 | 0.00    | 44.11   |
| P07237 | P4HB   | 130.88  | 62.28   |
| Q9BZF1 | OSBPL8 | 0.00    | 64.25   |
| P52948 | NUP98  | 0.00    | 44.19   |
| Q92621 | NUP205 | 0.00    | 65.86   |
| Q12769 | NUP160 | 0.00    | 95.01   |
| Q8WUM0 | NUP133 | 0.00    | 66.24   |
| P57740 | NUP107 | 0.00    | 57.77   |
| P46459 | NSF    | 37.71   | 0.00    |

|        |         |        |         |
|--------|---------|--------|---------|
| P06748 | NPM1    | 80.87  | 125.80  |
| Q15233 | NONO    | 62.67  | 0.00    |
| P35579 | MYH9    | 95.73  | 240.53  |
| P35580 | MYH10   | 69.09  | 165.90  |
| Q9Y6C9 | MTCH2   | 42.78  | 41.55   |
| Q13724 | MOGS    | 0.00   | 44.23   |
| Q9NP71 | MLXIPL  | 0.00   | 54.50   |
| Q9ULK4 | MED23   | 0.00   | 42.56   |
| Q96RQ3 | MCCC1   | 869.84 | 949.04  |
| Q7Z434 | MAVS    | 0.00   | 65.96   |
| P43243 | MATR3   | 0.00   | 212.47  |
| P56192 | MARS1   | 70.14  | 55.99   |
| Q96AG4 | LRRC59  | 48.52  | 49.75   |
| P42704 | LRPPRC  | 0.00   | 65.31   |
| P20700 | LMNB1   | 80.86  | 78.87   |
| P02545 | LMNA    | 555.85 | 713.49  |
| P49257 | LMAN1   | 63.28  | 91.14   |
| P17931 | LGALS3  | 0.00   | 38.65   |
| P00338 | LDHA    | 0.00   | 56.33   |
| Q9Y4W2 | LAS1L   | 0.00   | 60.22   |
| P13473 | LAMP2   | 0.00   | 55.68   |
| P35527 | KRT9    | 593.38 | 855.79  |
| P05787 | KRT8    | 238.06 | 115.65  |
| P08727 | KRT19   | 127.71 | 0.00    |
| P05783 | KRT18   | 71.85  | 0.00    |
| P08779 | KRT16   | 117.97 | 274.34  |
| P13645 | KRT10   | 510.39 | 498.32  |
| P04264 | KRT1    | 900.49 | 1216.98 |
| Q14974 | KPNB1   | 0.00   | 56.32   |
| Q92945 | KHSRP   | 131.18 | 451.54  |
| Q5VWX1 | KHDRBS2 | 53.96  | 0.00    |
| Q07666 | KHDRBS1 | 0.00   | 75.48   |
| P14923 | JUP     | 37.98  | 0.00    |
| P46940 | IQGAP1  | 0.00   | 43.10   |
| Q13418 | ILK     | 0.00   | 52.02   |
| Q12906 | ILF3    | 110.39 | 340.22  |
| Q12905 | ILF2    | 66.62  | 108.73  |
| P01834 | IGKC    | 87.34  | 0.00    |
| P11717 | IGF2R   | 0.00   | 47.40   |
| O00425 | IGF2BP3 | 0.00   | 41.52   |
| Q9NZI8 | IGF2BP1 | 0.00   | 38.33   |
| Q7Z6Z7 | HUWE1   | 0.00   | 47.07   |
| O43719 | HTATSF1 | 0.00   | 43.11   |



|        |           |        |        |
|--------|-----------|--------|--------|
| P10809 | HSPD1     | 256.45 | 87.26  |
| P38646 | HSPA9     | 197.37 | 317.74 |
| P11142 | HSPA8     | 320.42 | 464.52 |
| P11021 | HSPA5     | 242.57 | 238.09 |
| P0DMV9 | HSPA1B    | 156.76 | 206.89 |
| P14625 | HSP90B1   | 0.00   | 72.17  |
| P08238 | HSP90AB1  | 495.26 | 765.67 |
| P07900 | HSP90AA1  | 324.79 | 536.08 |
| P51659 | HSD17B4   | 52.43  | 57.01  |
| Q86YZ3 | HRNR      | 61.73  | 118.24 |
| Q1KMD3 | HNRNPUL2  | 0.00   | 104.26 |
| Q9BUJ2 | HNRNPUL1  | 0.00   | 69.52  |
| Q00839 | HNRNPU    | 256.67 | 386.76 |
| O43390 | HNRNPR    | 0.00   | 127.25 |
| P52272 | HNRNPM    | 317.68 | 371.61 |
| P14866 | HNRNPL    | 62.37  | 411.44 |
| P61978 | HNRNPK    | 448.97 | 695.08 |
| P31943 | HNRNPH1   | 134.63 | 348.22 |
| P52597 | HNRNPF    | 118.02 | 175.40 |
| O14979 | HNRNPDL   | 82.97  | 124.87 |
| B2RXH8 | HNRNPCL2  | 0.00   | 64.78  |
| P51991 | HNRNPA3   | 174.35 | 335.71 |
| P22626 | HNRNPA2B1 | 265.37 | 506.12 |
| Q32P51 | HNRNPA1L2 | 157.10 | 227.01 |
| Q2TB90 | HKDC1     | 0.00   | 205.28 |
| O94992 | HEXIM1    | 0.00   | 41.05  |
| P51858 | HDGF      | 45.98  | 75.36  |
| P02042 | HBD       | 62.09  | 44.78  |
| P55084 | HADHB     | 0.00   | 54.66  |
| P40939 | HADHA     | 43.13  | 72.27  |
| P16403 | H1-2      | 82.07  | 101.45 |
| Q9Y5Q9 | GTF3C3    | 0.00   | 49.82  |
| P78417 | GSTO1     | 0.00   | 56.07  |
| P00390 | GSR       | 0.00   | 41.14  |
| P49915 | GMPS      | 0.00   | 39.46  |
| O76003 | GLRX3     | 0.00   | 57.90  |
| Q92616 | GCN1      | 0.00   | 43.57  |
| P51570 | GALK1     | 62.05  | 74.08  |
| P11413 | G6PD      | 46.91  | 47.30  |
| P35637 | FUS       | 91.59  | 44.75  |
| Q96AE4 | FUBP1     | 0.00   | 339.25 |
| P02751 | FN1       | 111.96 | 189.18 |
| O75369 | FLNB      | 406.17 | 657.03 |

|        |         |        |         |
|--------|---------|--------|---------|
| P21333 | FLNA    | 229.60 | 335.01  |
| Q13045 | FLII    | 0.00   | 49.56   |
| Q5D862 | FLG2    | 52.47  | 53.26   |
| P20930 | FLG     | 42.12  | 0.00    |
| P02679 | FGG     | 103.21 | 235.63  |
| P02675 | FGB     | 76.30  | 213.55  |
| P02671 | FGA     | 176.00 | 448.49  |
| P37268 | FDFT1   | 47.69  | 109.26  |
| P09467 | FBP1    | 151.24 | 90.11   |
| P49327 | FASN    | 844.66 | 1484.73 |
| Q9Y4F1 | FARP1   | 0.00   | 132.19  |
| Q52LJ0 | FAM98B  | 0.00   | 92.80   |
| Q9Y6X4 | FAM169A | 176.33 | 113.71  |
| Q01844 | EWSR1   | 0.00   | 190.52  |
| O95571 | ETHE1   | 37.02  | 0.00    |
| P38117 | ETFB    | 0.00   | 36.16   |
| Q9BSJ8 | ESYT1   | 56.64  | 74.38   |
| O94905 | ERLIN2  | 66.17  | 51.74   |
| P07814 | EPRS1   | 0.00   | 115.99  |
| Q9HC35 | EML4    | 78.39  | 187.59  |
| Q15717 | ELAVL1  | 0.00   | 37.06   |
| Q99613 | EIF3C   | 0.00   | 41.30   |
| P55884 | EIF3B   | 49.19  | 71.47   |
| Q14152 | EIF3A   | 0.00   | 46.55   |
| Q15029 | EFTUD2  | 0.00   | 42.13   |
| P13639 | EEF2    | 80.43  | 62.18   |
| P26641 | EEF1G   | 59.54  | 68.51   |
| P68104 | EEF1A1  | 246.62 | 216.29  |
| Q13409 | DYNC1I2 | 38.86  | 0.00    |
| Q14204 | DYNC1H1 | 42.38  | 422.83  |
| Q99956 | DUSP9   | 47.41  | 71.78   |
| P15924 | DSP     | 0.00   | 58.43   |
| Q02413 | DSG1    | 0.00   | 46.05   |
| Q16555 | DPYSL2  | 37.87  | 0.00    |
| P31689 | DNAJA1  | 37.03  | 0.00    |
| P36957 | DLST    | 0.00   | 36.47   |
| P10515 | DLAT    | 43.58  | 46.55   |
| Q9Y2L1 | DIS3    | 0.00   | 74.21   |
| Q08211 | DHX9    | 40.65  | 242.30  |
| Q92620 | DHX38   | 0.00   | 66.44   |
| O43143 | DHX15   | 0.00   | 156.51  |
| Q13268 | DHRS2   | 132.85 | 175.47  |
| Q9UBM7 | DHCR7   | 0.00   | 52.42   |

|        |          |        |        |
|--------|----------|--------|--------|
| Q15392 | DHCR24   | 0.00   | 57.47  |
| P17844 | DDX5     | 0.00   | 216.42 |
| Q7L014 | DDX46    | 0.00   | 44.64  |
| Q86XP3 | DDX42    | 0.00   | 67.45  |
| O00571 | DDX3X    | 71.10  | 158.16 |
| O00148 | DDX39A   | 0.00   | 71.05  |
| Q92841 | DDX17    | 138.20 | 465.07 |
| Q5TDH0 | DDI2     | 44.13  | 0.00   |
| P81605 | DCD      | 0.00   | 52.56  |
| O60716 | CTNND1   | 0.00   | 54.74  |
| P01040 | CSTA     | 45.59  | 61.78  |
| Q9BRF8 | CPPED1   | 0.00   | 75.80  |
| Q9UBF2 | COPG2    | 51.32  | 45.96  |
| P53618 | COPB1    | 0.00   | 75.68  |
| P53621 | COPA     | 81.61  | 325.31 |
| Q13057 | COASY    | 0.00   | 34.01  |
| Q00610 | CLTC     | 239.42 | 335.84 |
| P09496 | CLTA     | 0.00   | 40.10  |
| O00299 | CLIC1    | 73.29  | 0.00   |
| P23528 | CFL1     | 42.92  | 0.00   |
| Q16543 | CDC37    | 45.56  | 73.49  |
| Q8N163 | CCAR2    | 0.00   | 83.06  |
| Q01518 | CAP1     | 0.00   | 42.69  |
| Q86VP6 | CAND1    | 0.00   | 87.98  |
| Q9NZT1 | CALML5   | 63.36  | 0.00   |
| P27708 | CAD      | 0.00   | 54.86  |
| P48047 | ATP5PO   | 38.67  | 0.00   |
| O75947 | ATP5PD   | 70.41  | 0.00   |
| P36542 | ATP5F1C  | 41.14  | 54.94  |
| P25705 | ATP5F1A  | 361.77 | 316.52 |
| P05023 | ATP1A1   | 0.00   | 152.30 |
| P40616 | ARL1     | 0.00   | 38.12  |
| P18085 | ARF4     | 51.00  | 78.92  |
| P07741 | APRT     | 50.41  | 50.20  |
| P04114 | APOB     | 0.00   | 60.35  |
| O14617 | AP3D1    | 0.00   | 53.42  |
| P63010 | AP2B1    | 0.00   | 68.53  |
| O95782 | AP2A1    | 0.00   | 55.78  |
| O43747 | AP1G1    | 0.00   | 81.59  |
| P20073 | ANXA7    | 0.00   | 45.80  |
| P08133 | ANXA6    | 0.00   | 43.03  |
| P04075 | ALDOA    | 85.73  | 93.61  |
| P54886 | ALDH18A1 | 38.69  | 52.63  |

|        |        |        |        |
|--------|--------|--------|--------|
| P02768 | ALB    | 64.83  | 103.30 |
| P42330 | AKR1C3 | 62.11  | 50.72  |
| O43823 | AKAP8  | 0.00   | 41.41  |
| P27144 | AK4    | 36.15  | 0.00   |
| Q13155 | AIMP2  | 0.00   | 64.55  |
| P23526 | AHCY   | 0.00   | 62.76  |
| Q96SZ5 | ADO    | 40.67  | 40.46  |
| O43707 | ACTN4  | 0.00   | 120.81 |
| P12814 | ACTN1  | 53.07  | 0.00   |
| P63267 | ACTG2  | 245.88 | 298.42 |
| Q9ULC5 | ACSL5  | 157.69 | 262.56 |
| O60488 | ACSL4  | 0.00   | 79.19  |
| Q96CM8 | ACSF2  | 61.51  | 0.00   |
| P53396 | ACLY   | 118.81 | 412.26 |
| P49748 | ACADVL | 70.40  | 0.00   |
| Q13085 | ACACA  | 533.76 | 867.63 |

**Supplementary Table S2 The sequences of the primers used in this study**

| Gene name                                           |   | Primer Sequence (5'→3')                      |
|-----------------------------------------------------|---|----------------------------------------------|
| <b>Primers for detection of expression</b>          |   |                                              |
| ACTB                                                | F | ACTCTTCCAGCCTTCCTTCC                         |
|                                                     | R | TGTTGGCGTACAGGTCTTTG                         |
| PRKDC                                               | F | CATGGAAGAAGATCCCCAGA                         |
|                                                     | R | TGGGCACACCACTTTAACAA                         |
| HBV 3.5-kb pgRNA                                    | F | GCCTTAGAGTCTCCTGAGCA                         |
|                                                     | R | GAGGGAGTTCTTCTCTAGG                          |
| Total HBV RNAs                                      | F | ACCGACCTTGAGGCATACTT                         |
|                                                     | R | GCCTACAGCCTCCTAGTACA                         |
| HBV HBC                                             | F | TTCGCACTCCTCCAGCTTAT                         |
|                                                     | R | GGCGAGGGAGTTCTTCTCT                          |
| <b>Primers for quantification of viral titer</b>    |   |                                              |
| HBV DNA                                             | F | CCTAGTAGTCAGTTATGTCAAC                       |
|                                                     | R | TCTATAAGCTGGAGGAGTGCGA                       |
| <b>Primers for ChIP-qPCR</b>                        |   |                                              |
| HBV cccDNA                                          | F | GTGCACTTCGCTTCACCTCT                         |
|                                                     | R | AGCTTGAGGCTTGAACAGT                          |
| HBV cccDNA probe                                    |   | 5'-FAM-ACGTGCGATGGAGACCACCGTGAACGCC-TAMRA-3' |
| MYH7                                                | F | AGAAGCTGCGCTCAGACCTGTCTCG                    |
|                                                     | R | TCCAGGTCCCGCCGATCTT                          |
| GAPDH                                               | F | TACTAGCGTTTTACGGGCG                          |
|                                                     | R | TCGAACAGGAGGAGCAGAGAGCGA                     |
| GAPDH-Pol II Ser2                                   | F | CTCCTGGAAGGGCTTCGTAT                         |
|                                                     | R | CTTAAGGCATGGCTGCAACT                         |
| GAPDH-Pol II Ser5                                   | F | TACTAGCGTTTTACGGGCG                          |
|                                                     | R | TCGAACAGGAGGAGCAGAGAGCGA                     |
| <b>Primers for PRKDC knockdown target sequences</b> |   |                                              |
| shPRKDC-1                                           | F | GCCTTACTAGAAGCTATATTG                        |
| shPRKDC-2                                           | F | CCTGAAGTCTTTACAACATAT                        |
| <b>Primers for sgRNAs</b>                           |   |                                              |
| sgRNA-1                                             | F | CACCGTCTAGAAGATCTCGTACTGA                    |
|                                                     | R | AAACTCAGTACGAGATCTTCTAGAC                    |
| sgRNA-2                                             | F | CACCGACTACTGTTGTTAGACGACG                    |
|                                                     | R | AAACCGTCGTCTAACAAACAGTAGTC                   |
| sgRNA-3                                             | F | CACCGGATTGAGATCTTCTGCGACG                    |
|                                                     | R | AAACCGTCGCAGAAGATCTCAATCC                    |
| sgRNA-4                                             | F | CACCGATTTGGTGTCTTTCGGAGTG                    |
|                                                     | R | AAACCACTCCGAAAGACACCAAATC                    |
| sgRNA-5                                             | F | CACCGCAGTTATGTCAACACTAATA                    |
|                                                     | R | AAACTATTAGTGTTGACATAACTGC                    |
| sgRNA-6                                             | F | CACCGAGGAGGCTGTAGGCATAAAT                    |

|         |   |                           |
|---------|---|---------------------------|
|         | R | AAACATTTATGCCTACAGCCTCCTC |
| sgRNA-7 | F | CACCGAGCTTGGAGGCTTGAACAGT |
|         | R | AAACACTGTTCAAGCCTCCAAGCTC |
| sgRNA-8 | F | CACCGCAAGCCTCCAAGCTGTGCCT |
|         | R | AAACAGGCACAGCTTGGAGGCTTGC |
| sgGal4  | F | CACCGAACGACTAGTTAGGCGTGTA |
|         | R | AAACTACACGCCTAACTAGTCGTTC |
